# Supplementary material
Source: PubMed Central journal article supplement (PMC11165930)
Supplement: NIHMS1993422-supplement-Appendix_A.pdf [file NIHMS1993422-supplement-Appendix_A.pdf]

Patient Identifier:

Patient Agreed to Callback: Yes/No

## Opioid Callback Program: Process Steps

### Part 1: Prescription Information

|               |           |
|---------------|-----------|
| Pick-up date: | SIG:      |
| Medication:   | Quantity: |

### Part 2: Introductory Script and Telephone Contact:

(Pharmacy name) is piloting an Opioid Callback program. We would like to call you in 2 to 3 days to check-in regarding how your prescription for pain management is working, and if I can provide additional support.

When would be a good time to call in a few days to see how things are going?

Attempt 1 (Date):

Attempt 2 (Date):

Attempt 3 (Date):

### Part 2: Medication Use and Pain Assessment

*Introductory Text:* It looks like on (date) you picked up (medication name) for pain control.

- 1) What are you taking this medication for? (e.g., wisdom teeth, broken bone, post-surgery)?
  
- 2) How are you taking this medication now?
  - a. How frequently are/were you taking this medication?
  
  - b. How many tablets/capsules do/did you take?
  
- 3) What side-effects have/had you experienced from taking the medication(s)? [Note: Ensure patient has a bowel regimen]
  
  
- 4) Where are you storing the medications (e.g., counter, locked-up, do not know)? If not locked-up, emphasize the importance of keep the opioid out of reach of other individuals.

**Part 3: Pain Assessment**

- 1) Since you last picked up your prescription, would you describe your pain as:
  - Better (Skip to Part 4)
  - Worse
  - The Same

*Questions to ask if pain is worse or the same*

**What makes your pain worse?**

**What have you tried to make your pain better?**

Interventions made (if any):

- 2) Can we call you back in 1 month to see how you are doing?
  - Yes
  - No

**Part 4: Medication Disposal and Safety**

When you picked up your prescription at the pharmacy, do you recall talking with the pharmacist about medication disposal options?

- Yes
  - o If yes, what type of medication disposal options were discussed or shared with you?
  
  - o If yes, have you disposed of your opioid if you are no longer taking it?
  
- No (Would you like to learn more about how to safely dispose of your opioid medication?)

What methods of opioid safety were discussed when you picked up your prescription at the pharmacy?

- No discussion of opioid safety
- Naloxone
- Drug interactions (alcohol, BZDs)
- Not taking more than prescribed
- Other:

**Thank you for your time and for choosing (pharmacy name) for your medication needs!**

**DEMOGRAPHICS**

|                       |                |               |
|-----------------------|----------------|---------------|
| Patient Name:<br>DOB: | PCP:<br>NPI:   | Today's Date: |
| Phone Number:         | Original Rx #: | RPh:          |

**INTERVENTION**

|                 |                                     |                                              |
|-----------------|-------------------------------------|----------------------------------------------|
| Date Picked Up: | Date of Intervention:               | Time of Phone Call:<br>Length of Phone Call: |
| Drug Name:      | Directions:<br>Duration of Therapy: | Prescriber:                                  |

|                                    |                  |               |
|------------------------------------|------------------|---------------|
| <b>SYMPTOMS &amp; SIDE EFFECTS</b> | <b>ADHERENCE</b> | <b>SAFETY</b> |
|------------------------------------|------------------|---------------|

|                                                                                                                                                                                                                                                                                                                                                                                                                                                                                                                                                                                                                                                                                                                                                                                                                                                                                                                                           |                                                                                                                                                                                                                                                                                                                                                                           |                                                                                                                                                                                                                                                                                                                                                                                                                                                                                                                                                                                                                                                                                                                                                                                    |
|-------------------------------------------------------------------------------------------------------------------------------------------------------------------------------------------------------------------------------------------------------------------------------------------------------------------------------------------------------------------------------------------------------------------------------------------------------------------------------------------------------------------------------------------------------------------------------------------------------------------------------------------------------------------------------------------------------------------------------------------------------------------------------------------------------------------------------------------------------------------------------------------------------------------------------------------|---------------------------------------------------------------------------------------------------------------------------------------------------------------------------------------------------------------------------------------------------------------------------------------------------------------------------------------------------------------------------|------------------------------------------------------------------------------------------------------------------------------------------------------------------------------------------------------------------------------------------------------------------------------------------------------------------------------------------------------------------------------------------------------------------------------------------------------------------------------------------------------------------------------------------------------------------------------------------------------------------------------------------------------------------------------------------------------------------------------------------------------------------------------------|
| <p><b>Pain Score:</b></p> <p align="center">1 2 3 4 5 6 7 8 9 10</p> <p>List other symptoms of pain:</p> <p>Has the patient experienced side effects with their opioid medication?</p> <ul style="list-style-type: none"> <li><input type="checkbox"/> None</li> <li><input type="checkbox"/> Constipation</li> <li><input type="checkbox"/> Drowsiness</li> <li><input type="checkbox"/> Nausea</li> <li><input type="checkbox"/> Other:</li> </ul> <p>Has patient utilized other methods of pain relief?</p> <ul style="list-style-type: none"> <li><input type="checkbox"/> No</li> <li><input type="checkbox"/> Yes, explain:</li> </ul> <p>Is the patient willing to try alternative pain control methods?</p> <ul style="list-style-type: none"> <li><input type="checkbox"/> Yes</li> <li><input type="checkbox"/> No</li> </ul> <p>What alternative pain control methods were discussed with the patient?</p> <p>Other Notes:</p> | <p><b>How is patient taking?</b></p> <ul style="list-style-type: none"> <li><input type="checkbox"/> As prescribed</li> <li><input type="checkbox"/> Other:</li> </ul> <p>Has patient had to take more than prescribed?</p> <ul style="list-style-type: none"> <li><input type="checkbox"/> No</li> <li><input type="checkbox"/> Yes, why?</li> </ul> <p>Other Notes:</p> | <p><b>Does the patient have issues disposing of the medication?</b></p> <ul style="list-style-type: none"> <li><input type="checkbox"/> No</li> <li><input type="checkbox"/> Yes</li> </ul> <p>What opioid disposal methods were discussed?</p> <ul style="list-style-type: none"> <li><input type="checkbox"/> DisposeRx</li> <li><input type="checkbox"/> Drug takeback programs</li> <li><input type="checkbox"/> Other:</li> </ul> <p>What methods of opioid safety were discussed?</p> <ul style="list-style-type: none"> <li><input type="checkbox"/> Naloxone</li> <li><input type="checkbox"/> Drug interactions (alcohol, BZDs)</li> <li><input type="checkbox"/> Not taking more than prescribed</li> <li><input type="checkbox"/> Other:</li> </ul> <p>Other Notes:</p> |
|-------------------------------------------------------------------------------------------------------------------------------------------------------------------------------------------------------------------------------------------------------------------------------------------------------------------------------------------------------------------------------------------------------------------------------------------------------------------------------------------------------------------------------------------------------------------------------------------------------------------------------------------------------------------------------------------------------------------------------------------------------------------------------------------------------------------------------------------------------------------------------------------------------------------------------------------|---------------------------------------------------------------------------------------------------------------------------------------------------------------------------------------------------------------------------------------------------------------------------------------------------------------------------------------------------------------------------|------------------------------------------------------------------------------------------------------------------------------------------------------------------------------------------------------------------------------------------------------------------------------------------------------------------------------------------------------------------------------------------------------------------------------------------------------------------------------------------------------------------------------------------------------------------------------------------------------------------------------------------------------------------------------------------------------------------------------------------------------------------------------------|

|                               |                                                                                                                                                                                                                                                                                                                                                                                                                                                                                                                                                                                                                                                                                                                                                                            |
|-------------------------------|----------------------------------------------------------------------------------------------------------------------------------------------------------------------------------------------------------------------------------------------------------------------------------------------------------------------------------------------------------------------------------------------------------------------------------------------------------------------------------------------------------------------------------------------------------------------------------------------------------------------------------------------------------------------------------------------------------------------------------------------------------------------------|
| <b>Consult Notes:</b>         | <b>Level 1 Recommendations:</b> <ul style="list-style-type: none"><li><input type="checkbox"/> Conversion to OTC</li><li><input type="checkbox"/> Decrease Dose</li><li><input type="checkbox"/> Dose Formulation Change</li><li><input type="checkbox"/> Dose Consolidation</li><li><input type="checkbox"/> Formulary Interchange</li><li><input type="checkbox"/> Increase Dose</li><li><input type="checkbox"/> Lengthen Duration</li><li><input type="checkbox"/> Medication Addition</li><li><input type="checkbox"/> Medication Deletion</li><li><input type="checkbox"/> Shorten Duration</li><li><input type="checkbox"/> Therapeutic Interchange</li><li><input type="checkbox"/> Naloxone Training</li><li><input type="checkbox"/> Disposal Training</li></ul> |
| <b>Assessment/Plan:</b>       |                                                                                                                                                                                                                                                                                                                                                                                                                                                                                                                                                                                                                                                                                                                                                                            |
| <b>Items to Follow-Up On:</b> |                                                                                                                                                                                                                                                                                                                                                                                                                                                                                                                                                                                                                                                                                                                                                                            |
