# Supplementary material
Source: PubMed Central journal article supplement (PMC11165930)
Supplement: NIHMS1993422-supplement-Appendix_B.pdf [file NIHMS1993422-supplement-Appendix_B.pdf]

|                     |                 |                       |
|---------------------|-----------------|-----------------------|
| Participant Code #: | Interview Date: | Interviewer Initials: |
|---------------------|-----------------|-----------------------|

## PHARMACIST INTERVIEW GUIDE

Hello. My name is \_\_\_\_\_. I am a (researcher/research assistant) at the University of Wisconsin School of Pharmacy. Thank you for taking the time to speak with me today. Since you are a pharmacist who recently participated in our pilot Opioid Call-Back Program, I would like to understand your thoughts about participating in this program

I am going to record this interview so I can accurately capture what you say. Even though I am recording our conversation, everything we talk about is confidential. Please try not to give names or any other information that could identify you or others. The interview should take a minimum of 30 minutes, and you may skip any questions that you are uncomfortable answering or are not relevant. You may also stop the interview at any time. Do you have any questions before we begin?

*[Select Record.]*

### **A. QUESTIONS**

1. What were patients' general reaction to the call-backs?
  - a. Did patients decline to participate in the opioid call back program? If so, what reason(s) was given?
  - b. How did patients react when you talked about alternative pain control approaches?
2. Were you surprised by any of the feedback from the call-backs?
3. How did the call-backs impact pharmacy workflow?
4. How beneficial was the opioid call back program to assess patients' awareness about opioid disposal?
  - a. How did it affect your use of opioid disposal methods?
5. How beneficial was the opioid call back program to assess patients' awareness about opioid safety?
  - a. How did it affect your thoughts about opioid safety?
6. What difficulties, if any, were there in using the data collection form?
7. What are your plans to continue with call-backs?
8. What changes would you recommend, including other topics to talk about?
  - a. Would this involve the continued use of the data collection form?
9. What else would you like to share that we did not ask about related to the opioid-call back program?

**That is the last question I have for you. I really appreciate your taking time out of your busy schedule to talk with me. It means a lot to the success of this project. Do you have anything you would like to add before we end?**
